# Supplementary material for: Identification of Hub Genes in the Remodeling of Non-Infarcted Myocardium Following Acute Myocardial Infarction
Source: MDPI journal article supplement (doi:10.3390/jcdd9120409), 2022-11-22
Supplement: s1 [file s1]

Research progress of Top50 DEGs.

| Gene             | Expression Change | Degree | Ref.<br>(AMI associated) |
|------------------|-------------------|--------|--------------------------|
| <i>Timp1</i>     | Up                | 18     | Hub Gene                 |
| <i>Sparc</i>     | Up                | 16     | Hub Gene                 |
| <i>Spp1</i>      | Up                | 16     | Hub Gene                 |
| <i>Tgfb1</i>     | Up                | 16     | Hub Gene                 |
| <i>Decr1</i>     | Down              | 15     | Hub Gene                 |
| <i>Vim</i>       | Up                | 14     | Hub Gene                 |
| <i>Serpine1</i>  | Up                | 13     | Hub Gene                 |
| <i>Serpina3n</i> | Up                | 11     | Hub Gene                 |
| <i>Thbs2</i>     | Up                | 11     | Hub Gene                 |
| <i>Vcan</i>      | Up                | 10     | Hub Gene                 |
| <i>Stmn1</i>     | Up                | 9      | None                     |
| <i>Tgfb2</i>     | Up                | 9      | [76]                     |
| <i>Tyrobp</i>    | Up                | 9      | [77]                     |
| <i>Sdc4</i>      | Up                | 8      | [78]                     |
| <i>Tgfb3</i>     | Up                | 8      | [76]                     |
| <i>Top2a</i>     | Up                | 8      | None                     |
| <i>Ube2c</i>     | Up                | 8      | None                     |
| <i>Rrm2</i>      | Up                | 7      | [79]                     |
| <i>Cd36</i>      | Up                | 7      | [80,81]                  |
| <i>Serpine2</i>  | Up                | 7      | [82]                     |
| <i>Tagln</i>     | Up                | 7      | [83]                     |
| <i>Tacc3</i>     | Up                | 7      | None                     |
| <i>Spi1</i>      | Up                | 7      | [84]                     |
| <i>Timp2</i>     | Up                | 7      | [85]                     |
| <i>Thy1</i>      | Up                | 7      | [86]                     |
| <i>Sdc1</i>      | Up                | 6      | [87]                     |
| <i>Smc2</i>      | Up                | 6      | None                     |
| <i>Tagln2</i>    | Up                | 6      | [88]                     |
| <i>Slc11a1</i>   | Up                | 6      | None                     |
| <i>Tk1</i>       | Up                | 6      | [89]                     |
| <i>Vav1</i>      | Up                | 6      | [90]                     |
| <i>Tubb5</i>     | Up                | 6      | None                     |
| <i>Tpm4</i>      | Up                | 6      | [91]                     |
| <i>Acaa2</i>     | Down              | 5      | [92]                     |
| <i>Shisa5</i>    | Up                | 5      | None                     |
| <i>S100a4</i>    | Up                | 5      | [93]                     |
| <i>Tuba1a</i>    | Up                | 5      | None                     |
| <i>Serpinb1a</i> | Up                | 5      | [94]                     |
| <i>Smc4</i>      | Up                | 5      | None                     |
| <i>S100a6</i>    | Up                | 5      | [95]                     |
| <i>Tpm3</i>      | Up                | 5      | [96]                     |
| <i>Tnc</i>       | Up                | 5      | [97]                     |
| <i>Sec61a1</i>   | Up                | 4      | [98]                     |
| <i>Serpinh1</i>  | Up                | 4      | [99]                     |
| <i>Sec61b</i>    | Up                | 4      | None                     |
| <i>Tpm2</i>      | Up                | 4      | None                     |

|              |      |   |       |
|--------------|------|---|-------|
| <i>Tgfb1</i> | Up   | 4 | [100] |
| <i>Thbs3</i> | Up   | 4 | [101] |
| <i>Chpt1</i> | Down | 3 | None  |
| <i>Rrbp1</i> | Up   | 3 | None  |
